# Supplementary material for: OVOL2 sustains postnatal thymic epithelial cell identity
Source: PubMed Central journal article supplement (PMC10682436; doi:10.1038/s41467-023-43456-z), 2023-11-27
Supplement: 41467_2023_43456_MOESM3_ESM.pdf [file 41467_2023_43456_MOESM3_ESM.pdf]

## **Description of additional supplementary files**

**Supplementary Data 1.** Proteins identified in FLAG-OVOL2 and control immunoprecipitations by mass spectrometry.

**Supplementary Data 2.** Genes in accessible chromatin in *Ovol2*<sup>+/+</sup> TECs.

**Supplementary Data 3.** Genes in accessible chromatin in *Ovol2*<sup>C120Y/C120Y</sup> TECs.

**Supplementary Data 4.** Gene Ontology pathway enrichment among genes accessible in *Ovol2*<sup>C120Y/C120Y</sup> TECs.

**Supplementary Data 5.** Gene Ontology pathway enrichment among genes accessible in *Ovol2*<sup>+/+</sup> TECs.
